# Supplementary material
Source: PubMed Central journal article supplement (PMC2933960)

## **Supplemental Data**

**Figure S1.** HDGF-L5-9 was used for immunoprecipitation (IP). The IP product was displayed on a two-dimensional gel (left panel). The proteins on the gel were transferred on a membrane and hybridized with a polyclonal anti-HDGF antibody (right panel).

**Figure S2.** High magnification of HDGF-H3 and HDGF-C1 treated tumors as shown in Figure 1d.

**Figure S3.** Histology of major organs in mice treated with either PBS or an antibody (anti-HDGF-H3).

Figure S1

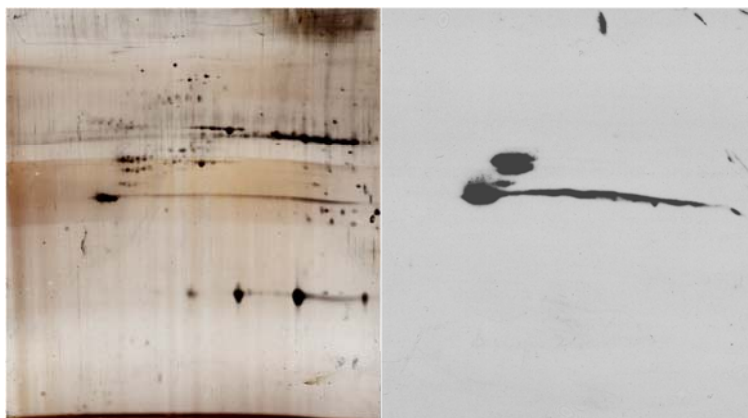

Figure S2

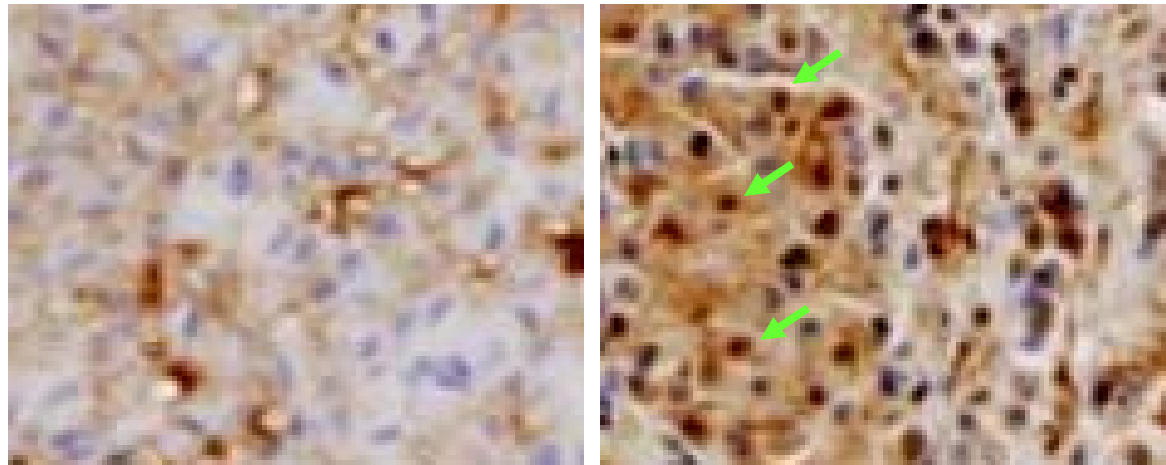

**HDGF-H3**

**HDGF-C1**

Figure S3

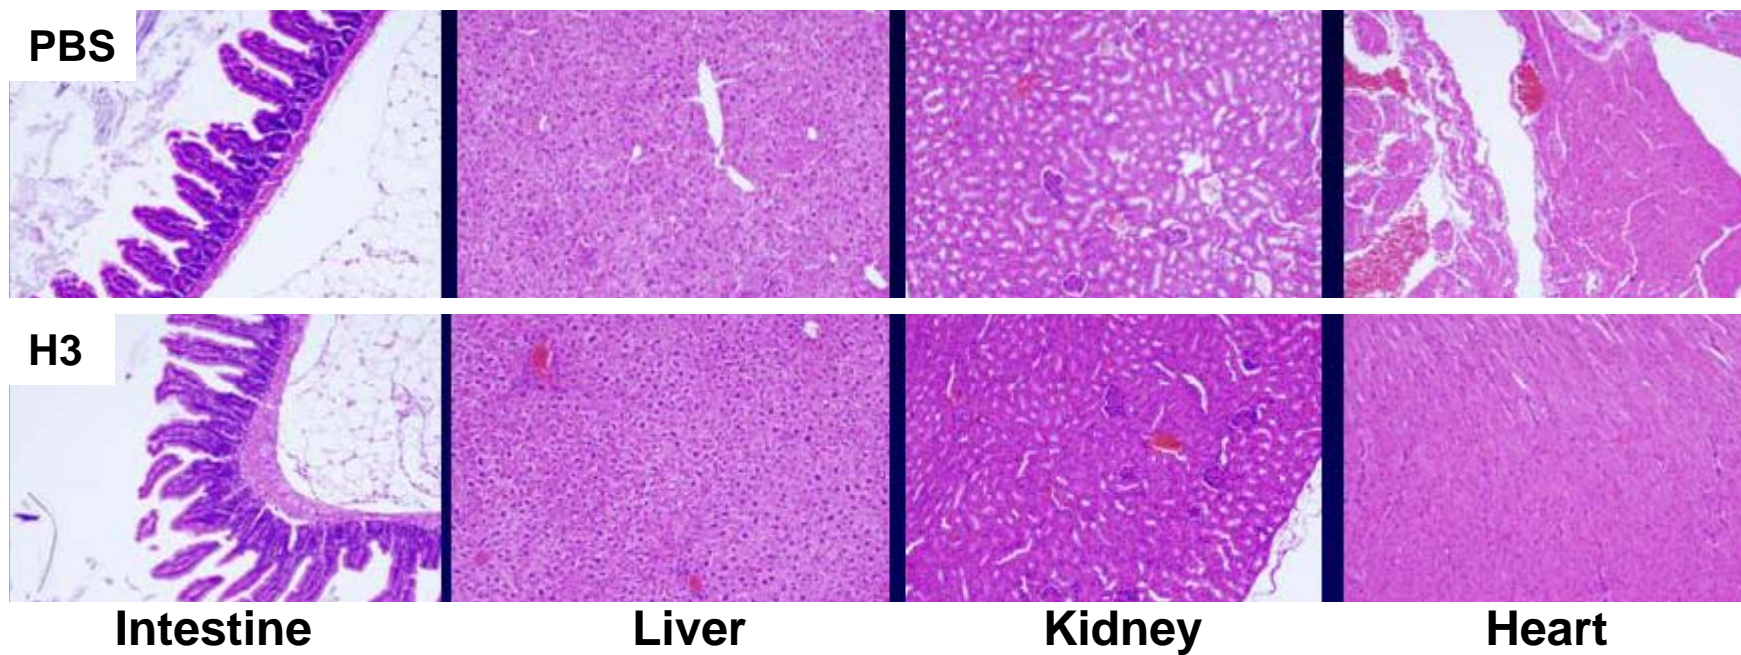

Supplement: NIHMS115707-supplement-supplement_1.pdf [file NIHMS115707-supplement-supplement_1.pdf]
